# Supplementary material
Source: Springer Nature journal article supplement (https://www.springermedizin.de/resource/supplementary/12871_2012_149_MOESM3_ESM.pdf/9428938)
Supplement: MOESM3 [file 9428938]

**Data collection form**  
**ASAP – ECMO Study**

Patient No.

|                                         |           |                                                       |                                     |                                |
|-----------------------------------------|-----------|-------------------------------------------------------|-------------------------------------|--------------------------------|
| Age                                     | Sex M / F | Weight (kg)                                           | Height (cm)                         |                                |
| ICU Admission Diagnosis                 |           | APACHE II*                                            | SOFA*                               |                                |
| Days/hours on ECMO                      |           |                                                       |                                     |                                |
| ECMO flow rate                          |           |                                                       |                                     |                                |
| Type of ECMO                            |           | <input type="checkbox"/> VA                           | <input type="checkbox"/> VV         | <input type="checkbox"/> Other |
| Pump                                    |           | <input type="checkbox"/> Jostra RotaFlow              | <input type="checkbox"/> Cardiohelp |                                |
|                                         |           | <input type="checkbox"/> Levotronix Centrimag         |                                     |                                |
| Oxygenator                              |           | <input type="checkbox"/> Quadrox                      |                                     |                                |
|                                         |           | <input type="checkbox"/> Other (please specify) _____ |                                     |                                |
| <b>During pharmacokinetic sampling</b>  |           |                                                       |                                     |                                |
| Serum bilirubin ( $\mu\text{mol/L}$ ):  |           | RRT: Yes / No                                         |                                     |                                |
|                                         |           | If YES, please specify mode and flows below.          |                                     |                                |
| Serum creatinine ( $\mu\text{mol/L}$ ): |           | CVVH                                                  | CVVHDF                              | SCUF                           |
| Serum Albumin (g/L):                    |           | EDD                                                   | IHD                                 | OTHER                          |
| Total proteins (g/L)                    |           | Effluent flow rate (ml/h):                            |                                     |                                |
|                                         |           | Blood flow rate (ml/min):                             |                                     |                                |
| Blood urea (mmol/L)                     |           | If NO, 8 hour creatinine clearance:                   |                                     |                                |
| Blood product transfusion details:      |           | 24 h fluid balance:                                   |                                     |                                |
